# Supplementary material for: Information Security Investment When Hackers Disseminate Knowledge
Source: Atypon-hosted journal article supplement (doi:10.1287/deca.2013.0278), 2013-12-01
Supplement: deca.2013.0278-sm.pdf [file deca.2013.0278-sm.pdf]

## Appendix

**Lemma 1.** For constant equilibrium solution  $c^0$  and  $z^0$ , payoffs of the firm and the hacker are given by

$$\begin{cases} J_f = -\frac{1}{\rho_f}(1+f\lambda)z^0 + \frac{h\lambda}{\rho_f}c^0 - \frac{L}{\rho_f}\Delta(z^0, c^0) + \frac{L\alpha}{\rho_f} + \lambda y_0 \\ J_h = -\frac{f\mu}{\rho_h}z^0 - \frac{1-h\mu}{\rho_h}c^0 + \frac{G}{\rho_h}\Delta(z^0, c^0) + \frac{(1-\alpha)G}{\rho_h} + \mu y_0 \end{cases}. \quad (\text{A1})$$

**Proof.** Because  $c^0$  and  $z^0$  are constant, the security breach probability rate  $\Delta(z^0, c^0) = \varepsilon(z^0)^{-\beta}(c^0)^\phi$  is constant as well. The related linear state equation  $\dot{y}(t) = ry(t) - fz^0 + hc^0$  can be solved as follows

$$y(t) = \left( y_0 - \frac{fz^0 - hc^0}{r} \right) e^{rt} + \frac{fz^0 - hc^0}{r}, \quad (\text{A2})$$

which yields

$$\int_0^\infty y(t) e^{-\rho t} dt = \frac{\rho y_0 - fz^0 + hc^0}{\rho(\rho - r)}. \quad (\text{A3})$$

Hence, one can finally obtain

$$\begin{aligned} J_f &= \int_0^\infty \left[ (\alpha - \Delta(z^0, c^0) - ky)L - z^0 \right] e^{-\rho_f t} dt \\ &= -kL \frac{\rho_f y_0 - fz^0 + hc^0}{\rho_f(\rho_f - r)} + \frac{L}{\rho_f} (\alpha - \Delta(z^0, c^0)) - \frac{1}{\rho_f} z^0 \\ &= -\frac{1}{\rho_f} \left( 1 - \frac{kfL}{\rho_f - r} \right) z^0 - \frac{khL}{\rho_f(\rho_f - r)} c^0 - \frac{L}{\rho_f} \Delta(z^0, c^0) + \frac{L\alpha}{\rho_f} - \frac{kLy_0}{\rho_f - r} \\ &= -\frac{1}{\rho_f} (1 + f\lambda) z^0 + \frac{h\lambda}{\rho_f} c^0 - \frac{L}{\rho_f} \Delta(z^0, c^0) + \frac{L\alpha}{\rho_f} + \lambda y_0 \end{aligned} \quad (\text{A4})$$

and

$$\begin{aligned} J_h &= \int_0^\infty \left[ (1 - \alpha + \Delta(z^0, c^0) + ky)G - c^0 \right] e^{-\rho_h t} dt \\ &= \frac{1}{\rho_h} (1 - \alpha + \Delta(z^0, c^0)) G - \frac{1}{\rho_h} c^0 + kG \frac{\rho_h y_0 - fz^0 + hc^0}{\rho_h(\rho_h - r)} \\ &= -\frac{kfG}{\rho_h(\rho_h - r)} z^0 - \frac{1}{\rho_h} \left( 1 - \frac{khG}{\rho_h - r} \right) c^0 + \frac{G}{\rho_h} \Delta(z^0, c^0) + \frac{(1-\alpha)G}{\rho_h} + \frac{kGy_0}{\rho_h - r} \\ &= -\frac{f\mu}{\rho_h} z^0 - \frac{1-h\mu}{\rho_h} c^0 + \frac{G}{\rho_h} \Delta(z^0, c^0) + \frac{(1-\alpha)G}{\rho_h} + \mu y_0 \end{aligned} \quad (\text{A5})$$

### Proof of Proposition 1.

Because the costate variables  $\lambda$  and  $\mu$  are constant, the equilibrium solution is constant. One can calculate directly by Lemma 1 that

$$\begin{aligned}
J_{f\_si} &= -\frac{1}{\rho_f} (1+f\lambda) \varepsilon^{\frac{1}{1-\phi+\beta}} \left( \frac{\beta L}{1+\lambda f} \right)^{\frac{1-\phi}{1-\phi+\beta}} \left( \frac{\phi G}{1-\mu h} \right)^{\frac{\phi}{1-\phi+\beta}} + \frac{h\lambda}{\rho_f} \varepsilon^{\frac{1}{1-\phi+\beta}} \left( \frac{\beta L}{1+\lambda f} \right)^{\frac{\beta}{1-\phi+\beta}} \left( \frac{\phi G}{1-\mu h} \right)^{\frac{1+\beta}{1-\phi+\beta}} \\
&\quad - \frac{L}{\rho_f} \varepsilon^{\frac{1}{1-\phi+\beta}} \left( \frac{\beta L}{1+\lambda f} \right)^{\frac{\beta}{1-\phi+\beta}} \left( \frac{\phi G}{1-\mu h} \right)^{\frac{\phi}{1-\phi+\beta}} + \frac{L\alpha}{\rho_f} + \lambda y_0 \\
&= -\frac{1}{\rho_f} (1+f\lambda) \varepsilon^{\frac{1}{1-\phi+\beta}} \left( \frac{\beta L}{1+\lambda f} \right)^{\frac{1-\phi}{1-\phi+\beta}} \left( \frac{\phi G}{1-\mu h} \right)^{\frac{\phi}{1-\phi+\beta}} \\
&\quad - \frac{1}{\rho_f} \left( L - h\lambda \frac{\phi G}{1-\mu h} \right) \varepsilon^{\frac{1}{1-\phi+\beta}} \left( \frac{\beta L}{1+\lambda f} \right)^{\frac{\beta}{1-\phi+\beta}} \left( \frac{\phi G}{1-\mu h} \right)^{\frac{\phi}{1-\phi+\beta}} + \frac{L\alpha}{\rho_f} + \lambda y_0 \\
&= -\frac{L}{\rho_f} \varepsilon^{\frac{1}{1-\phi+\beta}} \left( \frac{\beta L}{1+\lambda f} \right)^{\frac{\beta}{1-\phi+\beta}} \left( \frac{\phi G}{1-\mu h} \right)^{\frac{\phi}{1-\phi+\beta}} \left( 1 + \beta - \frac{h\lambda}{L} \frac{\phi G}{1-\mu h} \right) + \frac{L\alpha}{\rho_f} + \lambda y_0
\end{aligned} \tag{A6}$$

and

$$\begin{aligned}
J_{h\_si} &= -\frac{f\mu}{\rho_h} \varepsilon^{\frac{1}{1-\phi+\beta}} \left( \frac{\beta L}{1+\lambda f} \right)^{\frac{1-\phi}{1-\phi+\beta}} \left( \frac{\phi G}{1-\mu h} \right)^{\frac{\phi}{1-\phi+\beta}} - \frac{1-h\mu}{\rho_h} \varepsilon^{\frac{1}{1-\phi+\beta}} \left( \frac{\beta L}{1+\lambda f} \right)^{\frac{\beta}{1-\phi+\beta}} \left( \frac{\phi G}{1-\mu h} \right)^{\frac{1+\beta}{1-\phi+\beta}} \\
&\quad + \frac{G}{\rho_h} \varepsilon^{\frac{1}{1-\phi+\beta}} \left( \frac{\beta L}{1+\lambda f} \right)^{\frac{\beta}{1-\phi+\beta}} \left( \frac{\phi G}{1-\mu h} \right)^{\frac{\phi}{1-\phi+\beta}} + \frac{(1-\alpha)G}{\rho_h} + \mu y_0 \\
&= -\frac{f\mu}{\rho_h} \varepsilon^{\frac{1}{1-\phi+\beta}} \left( \frac{\beta L}{1+\lambda f} \right)^{\frac{1-\phi}{1-\phi+\beta}} \left( \frac{\phi G}{1-\mu h} \right)^{\frac{\phi}{1-\phi+\beta}} + \frac{G(1-\phi)}{\rho_h} \varepsilon^{\frac{1}{1-\phi+\beta}} \left( \frac{\beta L}{1+\lambda f} \right)^{\frac{\beta}{1-\phi+\beta}} \left( \frac{\phi G}{1-\mu h} \right)^{\frac{\phi}{1-\phi+\beta}} \\
&\quad + \frac{(1-\alpha)G}{\rho_h} + \mu y_0 \\
&= \frac{G}{\rho_h} \varepsilon^{\frac{1}{1-\phi+\beta}} \left( \frac{\beta L}{1+\lambda f} \right)^{\frac{\beta}{1-\phi+\beta}} \left( \frac{\phi G}{1-\mu h} \right)^{\frac{\phi}{1-\phi+\beta}} \left( 1 - \phi - \frac{f\mu}{G} \frac{\beta L}{1+\lambda f} \right) + \frac{(1-\alpha)G}{\rho_h} + \mu y_0
\end{aligned} \tag{A7}$$

## Proof of Proposition 2.

The equilibrium solution is constant in a similar fashion, which implies that by Lemma 1

$$\begin{aligned}
J_{f-\beta h} &= -\frac{1}{\rho_f} (1+f\lambda) \varepsilon^{\frac{1}{1-\phi+\beta}} \left( \frac{\phi G}{1-\mu h} \right)^{\frac{\phi}{1-\phi+\beta}} \left[ \frac{\beta L}{(1-\phi)(1+\lambda f)} \left( 1 - \frac{\lambda h}{L} \frac{\phi G}{1-\mu h} \right) \right]^{\frac{1-\phi}{1-\phi+\beta}} \\
&\quad + \frac{h\lambda}{\rho_f} \varepsilon^{\frac{1}{1-\phi+\beta}} \left( \frac{\phi G}{1-\mu h} \right)^{\frac{1+\beta}{1-\phi+\beta}} \left[ \frac{\beta L}{(1-\phi)(1+\lambda f)} \left( 1 - \frac{\lambda h}{L} \frac{\phi G}{1-\mu h} \right) \right]^{\frac{\beta}{1-\phi+\beta}} \\
&\quad - \frac{L}{\rho_f} \varepsilon^{\frac{1}{1-\phi+\beta}} \left( \frac{\phi G}{1-\mu h} \right)^{\frac{\phi}{1-\phi+\beta}} \left[ \frac{\beta L}{(1-\phi)(1+\lambda f)} \left( 1 - \frac{\lambda h}{L} \frac{\phi G}{1-\mu h} \right) \right]^{\frac{\beta}{1-\phi+\beta}} + \frac{L\alpha}{\rho_f} + \lambda y_0 \\
&= -\frac{1}{\rho_f} (1+f\lambda) \varepsilon^{\frac{1}{1-\phi+\beta}} \left( \frac{\phi G}{1-\mu h} \right)^{\frac{\phi}{1-\phi+\beta}} \left[ \frac{\beta L}{(1-\phi)(1+\lambda f)} \left( 1 - \frac{\lambda h}{L} \frac{\phi G}{1-\mu h} \right) \right]^{\frac{1-\phi}{1-\phi+\beta}} \\
&\quad - \frac{1}{\rho_f} \left( L - \lambda h \frac{\phi G}{1-\mu h} \right) \varepsilon^{\frac{1}{1-\phi+\beta}} \left( \frac{\phi G}{1-\mu h} \right)^{\frac{\phi}{1-\phi+\beta}} \left[ \frac{\beta L}{(1-\phi)(1+\lambda f)} \left( 1 - \frac{\lambda h}{L} \frac{\phi G}{1-\mu h} \right) \right]^{\frac{\beta}{1-\phi+\beta}} + \frac{L\alpha}{\rho_f} + \lambda y_0 \\
&= -\varepsilon^{\frac{1}{1-\phi+\beta}} \frac{(1-\phi+\beta)L}{\rho_f(1-\phi)} \left( \frac{\phi G}{1-\mu h} \right)^{\frac{\phi}{1-\phi+\beta}} \left[ \frac{\beta L}{(1-\phi)(1+\lambda f)} \left( 1 - \frac{\lambda h}{L} \frac{\phi G}{1-\mu h} \right) \right]^{\frac{\beta}{1-\phi+\beta}} \left( 1 - \frac{\lambda h}{L} \frac{\phi G}{1-\mu h} \right) \\
&\quad + \frac{L\alpha}{\rho_f} + \lambda y_0 \\
&= -\frac{L(1-\phi+\beta) \varepsilon^{\frac{1}{1-\phi+\beta}} (1-\phi)^{\frac{1-\phi}{1-\phi+\beta}}}{\rho_f} \left( \frac{\phi G}{1-\mu h} \right)^{\frac{\phi}{1-\phi+\beta}} \left( \frac{\beta L}{1+\lambda f} \right)^{\frac{\beta}{1-\phi+\beta}} \left( 1 - \frac{\lambda h}{L} \frac{\phi G}{1-\mu h} \right)^{\frac{1-\phi}{1-\phi+\beta}} + \frac{L\alpha}{\rho_f} + \lambda y_0
\end{aligned} \tag{A8}$$

and

$$\begin{aligned}
J_{h-\beta h} &= -\frac{f\mu}{\rho_h} \varepsilon^{\frac{1}{1-\phi+\beta}} \left( \frac{\phi G}{1-\mu h} \right)^{\frac{\phi}{1-\phi+\beta}} \left[ \frac{\beta L}{(1-\phi)(1+\lambda f)} \left( 1 - \frac{\lambda h}{L} \frac{\phi G}{1-\mu h} \right) \right]^{\frac{1-\phi}{1-\phi+\beta}} \\
&\quad - \frac{1-h\mu}{\rho_h} \varepsilon^{\frac{1}{1-\phi+\beta}} \left( \frac{\phi G}{1-\mu h} \right)^{\frac{1+\beta}{1-\phi+\beta}} \left[ \frac{\beta L}{(1-\phi)(1+\lambda f)} \left( 1 - \frac{\lambda h}{L} \frac{\phi G}{1-\mu h} \right) \right]^{\frac{\beta}{1-\phi+\beta}} \\
&\quad + \frac{G}{\rho_h} \varepsilon^{\frac{1}{1-\phi+\beta}} \left( \frac{\phi G}{1-\mu h} \right)^{\frac{\phi}{1-\phi+\beta}} \left[ \frac{\beta L}{(1-\phi)(1+\lambda f)} \left( 1 - \frac{\lambda h}{L} \frac{\phi G}{1-\mu h} \right) \right]^{\frac{\beta}{1-\phi+\beta}} + \frac{(1-\alpha)G}{\rho_h} + \mu y_0 \\
&= -\frac{f\mu}{\rho_h} \varepsilon^{\frac{1}{1-\phi+\beta}} \left( \frac{\phi G}{1-\mu h} \right)^{\frac{\phi}{1-\phi+\beta}} \left[ \frac{\beta L}{(1-\phi)(1+\lambda f)} \left( 1 - \frac{\lambda h}{L} \frac{\phi G}{1-\mu h} \right) \right]^{\frac{1-\phi}{1-\phi+\beta}} \\
&\quad + \frac{G(1-\phi)}{\rho_h} \varepsilon^{\frac{1}{1-\phi+\beta}} \left( \frac{\phi G}{1-\mu h} \right)^{\frac{\phi}{1-\phi+\beta}} \left[ \frac{\beta L}{(1-\phi)(1+\lambda f)} \left( 1 - \frac{\lambda h}{L} \frac{\phi G}{1-\mu h} \right) \right]^{\frac{\beta}{1-\phi+\beta}} + \frac{(1-\alpha)G}{\rho_h} + \mu y_0 \\
&= \varepsilon^{\frac{1}{1-\phi+\beta}} \left( \frac{\phi G}{1-\mu h} \right)^{\frac{\phi}{1-\phi+\beta}} \left( \frac{\beta L}{1+\lambda f} \right)^{\frac{\beta}{1-\phi+\beta}} \left[ \frac{1}{1-\phi} \left( 1 - \frac{\lambda h}{L} \frac{\phi G}{1-\mu h} \right) \right]^{\frac{\beta}{1-\phi+\beta}} \times \\
&\quad \left[ \frac{G(1-\phi)}{\rho_h} - \frac{f\mu}{\rho_h} \frac{\beta L}{(1-\phi)(1+\lambda f)} \left( 1 - \frac{\lambda h}{L} \frac{\phi G}{1-\mu h} \right) \right] + \frac{(1-\alpha)G}{\rho_h} + \mu y_0
\end{aligned} \tag{A9}$$

### Proof of Proposition 3.

The equilibrium solution is constant as well and thus one can obtain by Lemma 1

$$\begin{aligned}
J_{f\_hf} &= -\frac{1}{\rho_f}(1+f\lambda)\varepsilon^{\frac{1}{1-\phi+\beta}}\left(\frac{\beta L}{1+\lambda f}\right)^{\frac{1-\phi}{1-\phi+\beta}}\left[\frac{\phi G}{(1+\beta)(1-\mu h)}\left(1-\frac{\mu f}{G}\frac{\beta L}{1+\lambda f}\right)\right]^{\frac{\phi}{1-\phi+\beta}} \\
&\quad +\frac{h\lambda}{\rho_f}\varepsilon^{\frac{1}{1-\phi+\beta}}\left(\frac{\beta L}{1+\lambda f}\right)^{\frac{\beta}{1-\phi+\beta}}\left[\frac{\phi G}{(1+\beta)(1-\mu h)}\left(1-\frac{\mu f}{G}\frac{\beta L}{1+\lambda f}\right)\right]^{\frac{1+\beta}{1-\phi+\beta}} \\
&\quad -\frac{L}{\rho_f}\varepsilon^{\frac{1}{1-\phi+\beta}}\left(\frac{\beta L}{1+\lambda f}\right)^{\frac{\beta}{1-\phi+\beta}}\left[\frac{\phi G}{(1+\beta)(1-\mu h)}\left(1-\frac{\mu f}{G}\frac{\beta L}{1+\lambda f}\right)\right]^{\frac{\phi}{1-\phi+\beta}}+\frac{L\alpha}{\rho_f}+\lambda y_0 \\
&= \frac{h\lambda}{\rho_f}\varepsilon^{\frac{1}{1-\phi+\beta}}\left(\frac{\beta L}{1+\lambda f}\right)^{\frac{\beta}{1-\phi+\beta}}\left[\frac{\phi G}{(1+\beta)(1-\mu h)}\left(1-\frac{\mu f}{G}\frac{\beta L}{1+\lambda f}\right)\right]^{\frac{1+\beta}{1-\phi+\beta}} \\
&\quad -\frac{L(1+\beta)}{\rho_f}\varepsilon^{\frac{1}{1-\phi+\beta}}\left(\frac{\beta L}{1+\lambda f}\right)^{\frac{\beta}{1-\phi+\beta}}\left[\frac{\phi G}{(1+\beta)(1-\mu h)}\left(1-\frac{\mu f}{G}\frac{\beta L}{1+\lambda f}\right)\right]^{\frac{\phi}{1-\phi+\beta}}+\frac{L\alpha}{\rho_f}+\lambda y_0 \\
&= -\frac{1}{\rho_f}\varepsilon^{\frac{1}{1-\phi+\beta}}\left(\frac{\beta L}{1+\lambda f}\right)^{\frac{\beta}{1-\phi+\beta}}\left(\frac{\phi G}{1-\mu h}\right)^{\frac{\phi}{1-\phi+\beta}}\left[\frac{1}{1+\beta}\left(1-\frac{\mu f}{G}\frac{\beta L}{1+\lambda f}\right)\right]^{\frac{\phi}{1-\phi+\beta}}\times \\
&\quad \left[L(1+\beta)-\frac{h\lambda\phi G}{(1+\beta)(1-\mu h)}\left(1-\frac{\mu f}{G}\frac{\beta L}{1+\lambda f}\right)\right]+\frac{L\alpha}{\rho_f}+\lambda y_0
\end{aligned} \tag{A10}$$

and

$$\begin{aligned}
J_{h\_hf} &= -\frac{f\mu}{\rho_h}\varepsilon^{\frac{1}{1-\phi+\beta}}\left(\frac{\beta L}{1+\lambda f}\right)^{\frac{1-\phi}{1-\phi+\beta}}\left[\frac{\phi G}{(1+\beta)(1-\mu h)}\left(1-\frac{\mu f}{G}\frac{\beta L}{1+\lambda f}\right)\right]^{\frac{\phi}{1-\phi+\beta}} \\
&\quad -\frac{1-h\mu}{\rho_h}\varepsilon^{\frac{1}{1-\phi+\beta}}\left(\frac{\beta L}{1+\lambda f}\right)^{\frac{\beta}{1-\phi+\beta}}\left[\frac{\phi G}{(1+\beta)(1-\mu h)}\left(1-\frac{\mu f}{G}\frac{\beta L}{1+\lambda f}\right)\right]^{\frac{1+\beta}{1-\phi+\beta}} \\
&\quad +\frac{G}{\rho_h}\varepsilon^{\frac{1}{1-\phi+\beta}}\left(\frac{\beta L}{1+\lambda f}\right)^{\frac{\beta}{1-\phi+\beta}}\left[\frac{\phi G}{(1+\beta)(1-\mu h)}\left(1-\frac{\mu f}{G}\frac{\beta L}{1+\lambda f}\right)\right]^{\frac{\phi}{1-\phi+\beta}}+\frac{(1-\alpha)G}{\rho_h}+\mu y_0 \\
&= -\frac{1-h\mu}{\rho_h}\varepsilon^{\frac{1}{1-\phi+\beta}}\left(\frac{\beta L}{1+\lambda f}\right)^{\frac{\beta}{1-\phi+\beta}}\left[\frac{\phi G}{(1+\beta)(1-\mu h)}\left(1-\frac{\mu f}{G}\frac{\beta L}{1+\lambda f}\right)\right]^{\frac{1+\beta}{1-\phi+\beta}} \\
&\quad +\frac{(1+\beta)(1-\mu h)}{\phi\rho_h}\varepsilon^{\frac{1}{1-\phi+\beta}}\left(\frac{\beta L}{1+\lambda f}\right)^{\frac{\beta}{1-\phi+\beta}}\left[\frac{\phi G}{(1+\beta)(1-\mu h)}\left(1-\frac{\mu f}{G}\frac{\beta L}{1+\lambda f}\right)\right]^{\frac{1+\beta}{1-\phi+\beta}}+\frac{(1-\alpha)G}{\rho_h}+\mu y_0 \\
&= \frac{(1-\phi+\beta)(1-h\mu)}{\phi\rho_h}\varepsilon^{\frac{1}{1-\phi+\beta}}\left(\frac{\beta L}{1+\lambda f}\right)^{\frac{\beta}{1-\phi+\beta}}\left(\frac{\phi G}{1-\mu h}\right)^{\frac{1+\beta}{1-\phi+\beta}}\left[\frac{1}{1+\beta}\left(1-\frac{\mu f}{G}\frac{\beta L}{1+\lambda f}\right)\right]^{\frac{1+\beta}{1-\phi+\beta}} \\
&\quad +\frac{(1-\alpha)G}{\rho_h}+\mu y_0
\end{aligned} \tag{A11}$$

**Proof of Proposition 4.**

By Proposition 1 and Proposition 2, we can get

$$\begin{cases} \frac{z_{fh}^*}{z^*} = \left[ \frac{1}{1-\phi} \left( 1 - \frac{\lambda h}{L} \frac{\phi G}{1-\mu h} \right) \right]^{\frac{1-\phi}{1-\phi+\beta}} \\ \frac{c_{fh}^*}{c^*} = \left[ \frac{1}{1-\phi} \left( 1 - \frac{\lambda h}{L} \frac{\phi G}{1-\mu h} \right) \right]^{\frac{\beta}{1-\phi+\beta}} \\ \frac{\Delta(z_{fh}^*, c_{fh}^*)}{\Delta(z^*, c^*)} = \left[ \frac{1}{1-\phi} \left( 1 - \frac{\lambda h}{L} \frac{\phi G}{1-\mu h} \right) \right]^{\frac{\beta}{1-\phi+\beta}} \end{cases}, \quad (\text{A12})$$

Noting that  $\lambda < 0$  and  $\mu > 0$ , we have

$$\frac{1}{1-\phi} \left( 1 - \frac{\lambda h}{L} \frac{\phi G}{1-\mu h} \right) > 1, \quad (\text{A13})$$

which yields Proposition 4 (i).

Similarly, by Proposition 1 and Proposition 3, we have

$$\begin{cases} \frac{z_{hf}^*}{z^*} = \left[ \frac{1}{1+\beta} \left( 1 - \frac{\mu f}{G} \frac{\beta L}{1+\lambda f} \right) \right]^{\frac{\phi}{1-\phi+\beta}} \\ \frac{c_{hf}^*}{c^*} = \left[ \frac{1}{1+\beta} \left( 1 - \frac{\mu f}{G} \frac{\beta L}{1+\lambda f} \right) \right]^{\frac{1+\beta}{1-\phi+\beta}} \\ \frac{\Delta(z_{hf}^*, c_{hf}^*)}{\Delta(z^*, c^*)} = \left[ \frac{1}{1+\beta} \left( 1 - \frac{\mu f}{G} \frac{\beta L}{1+\lambda f} \right) \right]^{\frac{\phi}{1-\phi+\beta}} \end{cases}, \quad (\text{A14})$$

which implies Proposition 4 (ii) because

$$\frac{1}{1+\beta} \left( 1 - \frac{\mu f}{G} \frac{\beta L}{1+\lambda f} \right) < 1. \quad (\text{A15})$$

**Proof of Proposition 5.**

By proposition 1 and proposition 2, it is obvious that  $J_{h_{-}fh} < J_{h_{-}si}$  if and only if

$$\left[ \frac{1}{1-\phi} \left( 1 - \frac{\lambda h}{L} \frac{\phi G}{1-\mu h} \right) \right]^{\frac{\beta}{1-\phi+\beta}} \left[ 1 - \phi - \frac{f\mu}{G} \frac{\beta L}{(1-\phi)(1+\lambda f)} \left( 1 - \frac{\lambda h}{L} \frac{\phi G}{1-\mu h} \right) \right] < 1 - \phi - \frac{f\mu}{G} \frac{\beta L}{1+\lambda f} \quad (\text{A16})$$

namely,

$$\frac{1-\phi-\frac{f\mu}{G}\frac{\beta L}{(1+\lambda f)(1-\phi)}\left(1-\frac{\lambda h}{L}\frac{\phi G}{1-\mu h}\right)}{1-\phi-\frac{f\mu}{G}\frac{\beta L}{1+\lambda f}} < \left[ \frac{1}{1-\phi}\left(1-\frac{\lambda h}{L}\frac{\phi G}{1-\mu h}\right) \right]^{\frac{\beta}{1-\phi+\beta}}, \quad (\text{A17})$$

which holds because

$$\frac{1}{1-\phi}\left(1-\frac{\lambda h}{L}\frac{\phi G}{1-\mu h}\right) > 1 \quad (\text{A18})$$

and

$$\frac{1-\phi-\frac{f\mu}{G}\frac{\beta L}{(1+\lambda f)(1-\phi)}\left(1-\frac{\lambda h}{L}\frac{\phi G}{1-\mu h}\right)}{1-\phi-\frac{f\mu}{G}\frac{\beta L}{1+\lambda f}} < 1. \quad (\text{A19})$$

Furthermore, we are able to obtain that  $J_{h_{-hf}} > J_{h_{-si}}$  if and only if

$$\begin{aligned} \frac{(1-\phi+\beta)(1-h\mu)}{\phi}\left(\frac{\phi G}{1-\mu h}\right)^{\frac{1+\beta}{1-\phi+\beta}} \left[ \frac{1}{1+\beta}\left(1-\frac{\mu f}{G}\frac{\beta L}{1+\lambda f}\right) \right]^{\frac{1+\beta}{1-\phi+\beta}} \\ > G\left(\frac{\phi G}{1-\mu h}\right)^{\frac{\phi}{1-\phi+\beta}} \left(1-\phi-\frac{f\mu}{G}\frac{\beta L}{1+\lambda f}\right) \end{aligned} \quad (\text{A20})$$

namely,

$$\left[ \frac{1}{1+\beta}\left(1-\frac{\mu f}{G}\frac{\beta L}{1+\lambda f}\right) \right]^{\frac{1+\beta}{1-\phi+\beta}} > \frac{1}{1-\phi+\beta}\left(1-\phi-\frac{f\mu}{G}\frac{\beta L}{1+\lambda f}\right), \quad (\text{A21})$$

which holds by the continuity of  $k$  provided that

$$\left(\frac{1}{1+\beta}\right)^{\frac{1+\beta}{1-\phi+\beta}} > \frac{1-\phi}{1-\phi+\beta}, \quad (\text{A22})$$

namely

$$(1-\phi+\beta)\ln(1-\phi) - (1-\phi+\beta)\ln(1-\phi+\beta) + (1+\beta)\ln(1+\beta) < 0, \quad (\text{A23})$$

where  $\ln(x)$  is natural logarithms of  $x$ . Denoting

$$\Lambda(\phi) = (1-\phi+\beta)\ln(1-\phi) - (1-\phi+\beta)\ln(1-\phi+\beta) + (1+\beta)\ln(1+\beta),$$

one can obtain

$$\Lambda'(\phi) = \ln\left(1 + \frac{\beta}{1-\phi}\right) - \frac{\beta}{1-\phi} \square \ln(1+K) - K, \quad (\text{A24})$$

where  $K = \frac{\beta}{1-\phi} \in (1, \infty)$ . The derivative of  $\ln(1+K) - K$  with respect to  $K$  is  $-\frac{K}{1+K} < 0$ , which implies  $\Lambda'(\phi) = \ln(1+K) - K < \ln(2) - 1 < 0$  and further  $\Lambda(\phi) < \Lambda(0) = 0$ . Therefore, condition (A23) holds.

By proposition 1 and proposition 2, one can derive that  $J_{f\_fh} > J_{f\_si}$  if and only if

$$\left(1 + \beta - \frac{\lambda h}{L} \frac{\phi G}{1-\mu h}\right) > (1-\phi + \beta)(1-\phi)^{\frac{1-\phi}{1-\phi+\beta}} \left(1 - \frac{\lambda h}{L} \frac{\phi G}{1-\mu h}\right)^{\frac{1-\phi}{1-\phi+\beta}}, \quad (\text{A25})$$

namely,

$$\frac{1}{1 + \beta - \phi} \left(1 + \beta - \frac{\lambda h}{L} \frac{\phi G}{1-\mu h}\right) > \left[\frac{1}{1-\phi} \left(1 - \frac{\lambda h}{L} \frac{\phi G}{1-\mu h}\right)\right]^{\frac{1-\phi}{1-\phi+\beta}}, \quad (\text{A26})$$

which holds by the continuity of  $k$  provided that

$$\frac{1 + \beta}{1 + \beta - \phi} > \left(\frac{1}{1-\phi}\right)^{\frac{1-\phi}{1-\phi+\beta}} \quad (\text{A27})$$

or

$$(1-\phi + \beta)\ln(1 + \beta) - (1-\phi + \beta)\ln(1-\phi + \beta) + (1-\phi)\ln(1-\phi) \square \Phi(\phi) > 0. \quad (\text{A28})$$

One can obtain easily that

$$\Phi'(\phi) = \ln \frac{1-\phi + \beta}{(1-\phi)(1 + \beta)} > 0, \quad (\text{A29})$$

implying that  $\Phi(\phi) > \Phi(0) = 0$ , and therefore equation (A28) holds. Meanwhile, by proposition 2 and proposition 3, one can obtain that  $J_{f\_hf} > J_{f\_fh}$  if and only if

$$(1-\phi + \beta)(1-\phi)^{\frac{1-\phi}{1-\phi+\beta}} \left(1 - \frac{\lambda h}{L} \frac{\phi G}{1-\mu h}\right)^{\frac{1-\phi}{1-\phi+\beta}} > \left[\frac{1}{1 + \beta} \left(1 - \frac{\mu f}{G} \frac{\beta L}{1 + \lambda f}\right)\right]^{\frac{\phi}{1-\phi+\beta}} \left[(1 + \beta) - \frac{h\lambda\phi G}{(1 + \beta)L(1-\mu h)} \left(1 - \frac{\mu f}{G} \frac{\beta L}{1 + \lambda f}\right)\right], \quad (\text{A30})$$

which holds by the continuity of  $k$  provided that

$$(1-\phi+\beta)(1-\phi)^{\frac{1-\phi}{1+\beta}} > (1+\beta)^{\frac{1-2\phi+\beta}{1+\beta}}, \quad (\text{A31})$$

equivalently

$$(1-\phi+\beta)\ln(1-\phi+\beta) - (1-\phi)\ln(1-\phi) > (1-2\phi+\beta)\ln(1+\beta). \quad (\text{A32})$$

It suffices to prove

$$(1-\phi+\beta)\ln(1-\phi+\beta) > (\beta-\phi)\ln(1+\beta) + (1-\phi)\ln[(1-\phi)(1+\beta)]. \quad (\text{A33})$$

Denoting

$$\Theta(\beta) = (1-\phi+\beta)\ln(1-\phi+\beta) - (\beta-\phi)\ln(1+\beta) - (1-\phi)\ln[(1-\phi)(1+\beta)], \quad (\text{A34})$$

one can easily obtain that

$$\Theta'(\beta) = \ln \frac{1-\phi+\beta}{1+\beta} + \frac{2\phi}{1+\beta} = \ln \left( 1 - \frac{\phi}{1+\beta} \right) + \frac{2\phi}{1+\beta} \square \ln(1-\Delta) + 2\Delta, \quad (\text{A35})$$

where  $\Delta = \frac{\phi}{1+\beta} \in \left( 0, \frac{1}{2} \right)$ .

The derivative of  $\ln(1-\Delta) + 2\Delta$  with respect to  $\Delta$  takes the form:

$$\frac{1-2\Delta}{1-\Delta} > 0, \quad (\text{A36})$$

which implies  $\Theta'(\beta) = \ln(1-\Delta) + 2\Delta > 0$ . Hence,

$$\Theta(\beta) > \Theta(1) = (2-\phi)\ln(2-\phi) - (1-\phi)\ln[4(1-\phi)] \square \Omega(\phi). \quad (\text{A37})$$

Noting that

$$\Omega'(\phi) = \ln \frac{4(1-\phi)}{2-\phi}, \quad (\text{A38})$$

one can get  $\Omega'(\phi) > 0$  with  $\phi \in \left( 0, \frac{2}{3} \right)$  and  $\Omega'(\phi) < 0$  with  $\phi \in \left( \frac{2}{3}, 1 \right)$ , implying

$$\Theta(\beta) > \Omega(\phi) > \min(\Omega(0), \Omega(1)) = 0. \quad (\text{A39})$$

Hence, equation (A31) holds.
